# Supplementary material
Source: PubMed Central journal article supplement (PMC6318783)
Supplement: mmc1.pdf [file mmc1.pdf]

## **Supplemental Information**

### **A Stem Cell-Based Screening Platform**

### **Identifies Compounds that Desensitize Motor**

### **Neurons to Endoplasmic Reticulum Stress**

**Sebastian Thams, Emily Rhodes Lowry, Marie-Hélène Larraufie, Krista J. Spiller, Hai Li, Damian J. Williams, Phuong Hoang, Elise Jiang, Luis A. Williams, Jackson Sandoe, Kevin Eggan, Ivo Lieberam, Kevin C. Kanning, Brent R. Stockwell, Christopher E. Henderson, and Hynek Wichterle**

## **Supplemental materials and methods**

### **Automated image analysis**

To assess the number of “healthy” fluorescent cells exhibiting outgrowths >5 times the cell body diameter (assessment of overall survival) and to evaluate the mean neurite length per cell (assessment of neurite growth). These parameters were used consistently throughout the study.

### **Small molecule screen**

We consistently observed that the ratio of surviving untreated G93A mutant motor neurons to untreated wild-type motor neurons was ~0.83; in order to detect compounds acting synergistically to the genotype, all data were normalized to this ratio. Compounds resulting in a G93A-to-WT survival ratio of <0.67-fold, corresponding to a 50% difference in survival, were re-tested in five-point 2-fold dilution series. All hit compounds were evaluated visually, and wells with apparent artefacts such as auto-fluorescence and excessive cell clumping were removed. Compounds that were generally toxic, i.e., that resulted in lower survival than the controls with low trophic support for both genotypes, were rescreened in 1:10 dilution series. After completion of screen data collection, images for all hit compounds were individually evaluated in blinded manner. Wells with overall low survival or artefacts (e.g. precipitation, auto-fluorescence or significant cell detachment, were excluded for further analysis). The remaining compounds were tested in 8-point dose response titrations, in FACS-purified cultures and in an independent pair of mutant-wild type cell lines.

### **Immunohistochemistry**

Cultures were washed three times with 0.01 M PBS containing 0.3% Triton-X, prior to incubation with secondary antibodies (Alexa donkey 488/555/647) for 60 min in room temperature. The following primary antibodies were used: mouse Hb9 and mouse islet1/2 from Hybridoma Bank (1:100); mouse Human nuclear antigen from Millipore (MAB1281, clone 235-1, 1:1000); Tuj-1 from Neuromics or EMD Millipore (1:500); and phospho c-jun from Cell Signalling (1:100). Slides were examined in either a Zeiss AxioObserver with a Coolsnap HQ<sub>2</sub> camera (Photometrics), a Zeiss LSM Meta 510 or a Zeiss LSM 880 Axioobserver Z1 confocal microscope. Images were processed and sometimes cropped in Adobe Photoshop (Creative suit 6, Adobe Systems) for presentations purpose, changes were applied to the entire image, and in equal proportions to all images from the same.

### **Calcium imaging**

On day three post-dissociation, coverslips were incubated with 5  $\mu$ M Fura-2 AM, ratiometric calcium indicator dye (Life Sciences, USA) for 30 minutes at room temperature. After washing, coverslips were mounted on a Nikon Eclipse TE 3500 inverted microscope equipped with a 40 $\times$  1.30 NA objective (Nikon, USA), a pco.EDGE CMOS camera (pco, Germany), a Lambda LS light source, a Lambda LS-2 filterwheel with 340 nm and 380 nm excitation filters (both Sutter, USA). Images were first acquired using bright field and a fluorescent filter to identify cells to analyze at later steps. Drug applications were carried out using a custom-built focal application system located approximately 100  $\mu$ m from the field of view. A 5 s baseline for the Fura-2 signal was then acquired, followed by a 1 s pulse of 100  $\mu$ M kainic acid (KA). Epifluorescent images were captured at a rate of 1 image/sec for 1 min, switching between 340 and 380 nm filters every 500 ms. Cells were allowed to recover for 2 min, and only coverslips where cells returned to baseline were analyzed further. The coverslips were then continuously exposed to 7.5  $\mu$ M CPA while 1 image/30 sec was acquired for 20 min, followed by a 2 min recovery, and finally a second pulse of KA. Following acquisition, the 340/380 ratio of each pair of images was calculated on a pixel by pixel basis using FIJI software v. 1.4 ([www.fiji.sc](http://www.fiji.sc)). Regions of interest were drawn manually using the morphology of the cells from a single 340 image as a template. Quantification was carried out using Igor Pro v. 6 (Wavemetrics, USA). The rate at which the evoked calcium transients returned to the baseline was calculated from the tau (time constant) of a single exponential curve fitted to the falling part of the Ca intensity trace from 80% to 20% of the peak. Only neurons that recovered to 10% of the peak ratio value were included in the analysis.

## qPCR primers

|               |                                    |
|---------------|------------------------------------|
| Xbp1_1_fwd    | ACA CGC TTG GGA ATG GAC AC         |
| Xbp1_1_rev    | CCA TGG GAA GAT GTT CTG GG         |
| Xbp1_2_fwd    | GAA TGC CCA AAA GGA TAT CAG ACT C  |
| Xbp1_2_rev    | GGC CTT GTG GTT GAG AAC CAG GAG    |
| p58ipk_fwd    | TGG ACT TTA CTG CCG CAA GA         |
| p58ipk_rev    | CGT CAA GCT TCC CTT GTT TGA        |
| Gapdh_fwd     | CAT GGC CTT CCG TGT TCC TA         |
| Gapdh_rev     | GCG GCA CGT CAG ATC CA             |
| Erdj4_fwd     | CCT TTC ACA AAT TAG CCA TGA AGT AC |
| Erdj4_rev     | TGC TTC AGC ATC AGG GCT TT         |
| Chop_fwd      | AGG AGC CAG GGC CAA CA             |
| Chop_rev      | TCT GGA GAG CGA GGG CTT T          |
| Cd59a_fwd     | GCT GCT TCT GGC TGT GTT CTG        |
| Cd59a_rev     | GTT GGA AAC AGT GGT AGC ATG TG     |
| Bloc1s1_fwd   | CAG GCC TAC ATG AAC CAG AGA AA     |
| Bloc1s1_rev   | GGC AGC CTG GAC CTG TAG AG         |
| Nfkb2_fwd     | GTG GGC AAG CAG TGT TCA GA         |
| Nfkb2_rev     | TCA TGT CCT TGG GTC CTA CAG A      |
| Tnfrsf10b_fwd | CGT CTC ATG CGG CAG TTG            |
| Tnfrsf10b_rev | TCG GCT TTG ACC ATT TGG A          |
| Creb3l3_fwd   | CCA GCT GCC TCT CAC CAA GT         |
| Creb3l3_rev   | CCG GAT CTT TCT GCG GAT T          |
| Noxa_fwd      | CTG TGG TTC TGG CGC AGA T          |
| Noxa_rev      | GGG CTT GGG CTC CTC ATC            |
| Nrf2_fwd      | TTC CCG TGA GTC CTG GTC AT         |
| Nrf2_rev      | AGC GGC TTG AAT GTT TGT CTT T      |
| Tap1_fwd      | TTG GCC CGA GCC TTG A              |
| Tap1_rev      | TGG TGG CAT CAT CCA AGA TAA G      |
| Bip_fwd       | AGC CAT CCC GTG GCA TAA            |
| Bip_rev       | GGA CAG CGG CAC CAT AGG            |
| Calr_fwd      | GCC AGA CAC TGG TGG TAC AGT TC     |
| Calr_rev      | CGC CCC CAC AGT CGA TAT T          |
| Gadd45a_fwd   | GAC GAC GAC CGG GAT GTG            |
| Gadd45a_rev   | AGC AGA ACG CAC GGA TGA G          |
| Atf4_fwd      | CGA TGC TCT GTT TCG AAT GGA        |
| Atf4_rev      | CCA ACG TGG TCA AGA GCT CAT        |

## RNA-sequencing

RNA was isolated in duplicates from FACS-purified untreated, CPA treated and CPA + TUDCA treated MNS of both genotypes (hSOD1<sup>WT</sup> and hSOD1<sup>G93A</sup>), as described for RT-qPCR reactions. Poly-A pull-down was then used to enrich mRNAs from total RNA samples (1 µg per sample, RIN >8) and libraries were prepared using Illumina TruSeq RNA prep kit (San Diego, CA). Libraries were then sequenced using an Illumina HiSeq 2000 instrument (Columbia Genome Center, Columbia University). Read alignment and gene levels were calculated using Cufflinks and Tophat softwares. Raw FastQ sequencing data and processed normalized expression data (RPKM) were compared between. All genes associated with ER stress and associated pathways, suggested in the current literature, were selected for further analysis.

## Generation isogenic human embryonic stem cell lines by genetic targeting

After corroborating the desired SOD1 gene edit (Fig. S5B-C), we directed the differentiation of SOD1<sup>+/A4V</sup> and SOD1<sup>+/+</sup> HUES3 Hb9::GFP cells into cultures containing spinal motor neurons. GFP<sup>+</sup> motor neurons of both genotypes could be isolated using FACS (Fig. S5F), and SOD1 transcript and protein expression in these cells was confirmed (Fig. S5D-E). The new lines were further validated by staining for motor neuron transcription factor Islet1 (Fig. S5G) and assessment of survival in short and long term cultures (Figure S5H and J).

### ***In vivo* administration of TUDCA**

Drug was administered every three days from P30 to P51 for a total of 7 injections. At P51, mice were deeply anesthetized using ketamine/xylazine and intracardially perfused with ~15 mL room temperature phosphate-buffered saline (PBS) followed by ~30 mL of 4% PFA. Following dissection, tibialis anterior (TA) muscles were washed in PBS overnight, and then processed for cryoprotective embedding. To visualize NMJs, 30  $\mu$ m longitudinal cryosections of the whole TAs were incubated with  $\alpha$ -bungarotoxin conjugated to Alexa Fluor 488 (1:500; Invitrogen) and an antibody to vesicular acetylcholine transporter (VAcHT; raised in rabbit, Covance 1:32,000) to label motor endplates and nerve terminals, respectively. Because a lack of co-localization indicated muscle denervation, % NMJ innervation was determined by dividing the total number of areas of overlap between VAcHT and BTX signals (total number innervated endplates) by the number of areas containing BTX signal (total number of endplates). One TA was assessed for each animal (n=4-6), with every third section throughout the whole muscle stained and counted such that a minimum of 1000 NMJs were evaluated per animal. Images were acquired using a Nikon Eclipse TE-2000-E fluorescence microscope with a 4x or 10x objective. All animal work was performed in compliance with Columbia University IACUC protocols.

### **Statistics**

For cell cultures, a minimum of three independent experiments were generally performed, which was considered sufficient based on previous experience with this type of assays where culture conditions and cell lines were kept constant. For *in vivo* experiments, a power analysis based on pilot studies was performed to estimate the number of animals required to detect the studied effects. Data sets are expressed as mean value  $\pm$  SEM throughout the paper. Statistical analyses were performed with Graph Pad Prism (v. 7, GraphPad Software Inc.) or R' ([www.r-project.org](http://www.r-project.org)). If normal distribution and equal variance could be assumed, analysis of significance was performed with an unpaired two-tailed Student's t-test for pairwise comparison, or a One-way Anova with *post hoc* Dunnett's multiple comparison test. Otherwise, analysis was instead performed by Mann-Whitney Rank sum test or Kruskal-Wallis test with Dunn's multiple comparison *post hoc* test. Statistical significance is indicated by \*  $P < 0.05$ , \*\*  $P < 0.01$ , \*\*\*  $P < 0.001$ . Unless stated otherwise, each *N* represents an independent experiment or animal. In the few events where only one biological replicate was analyzed, the technical replicates were used to generate histograms, as stated in the figure legends when applicable. Statistical analyses were not performed on any of these data.



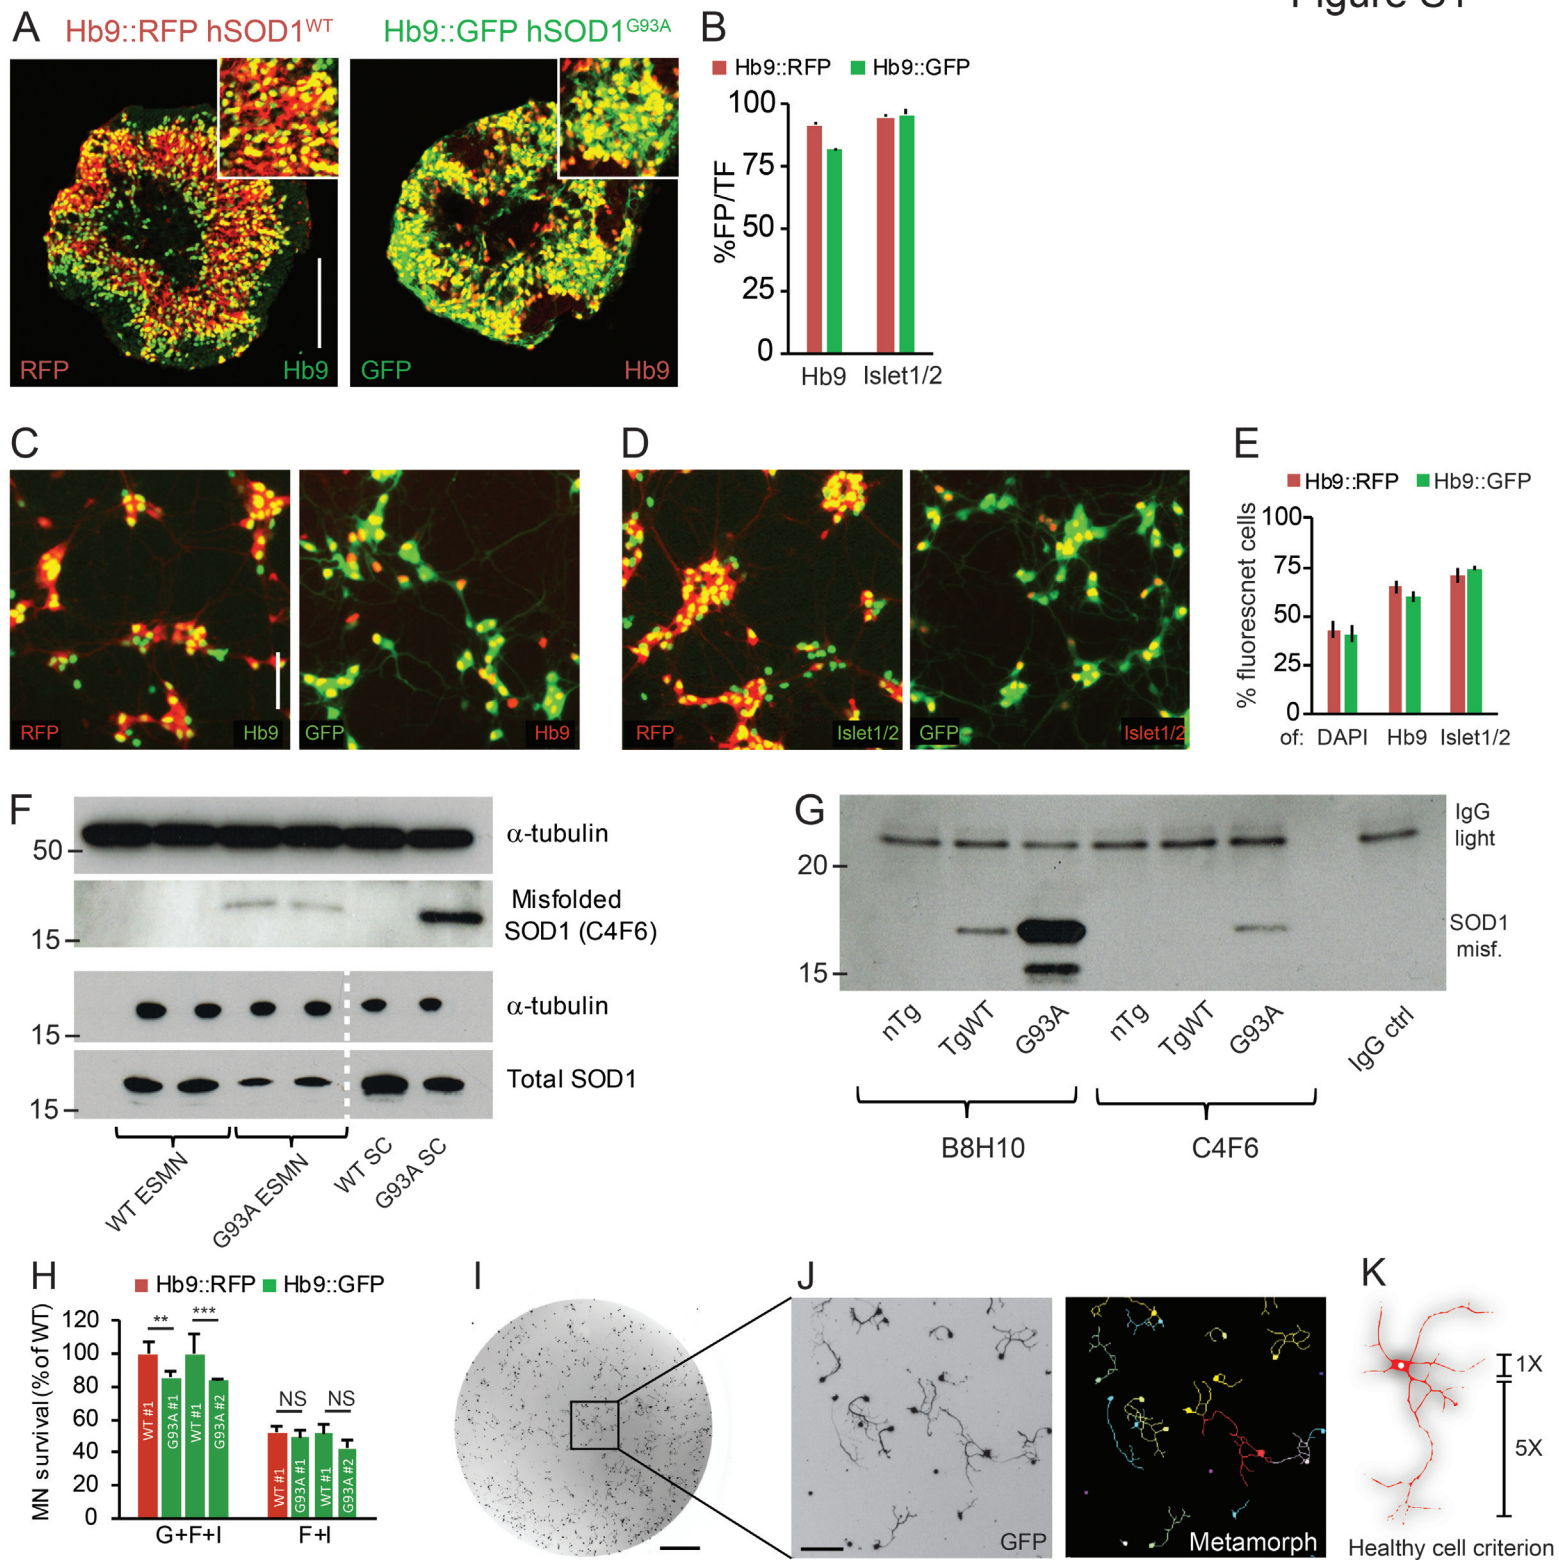

Fig S2

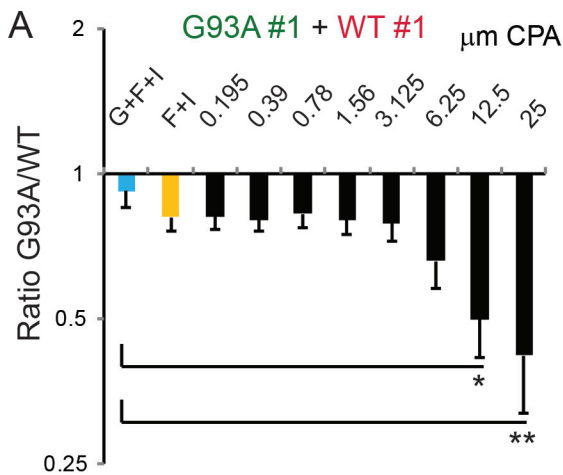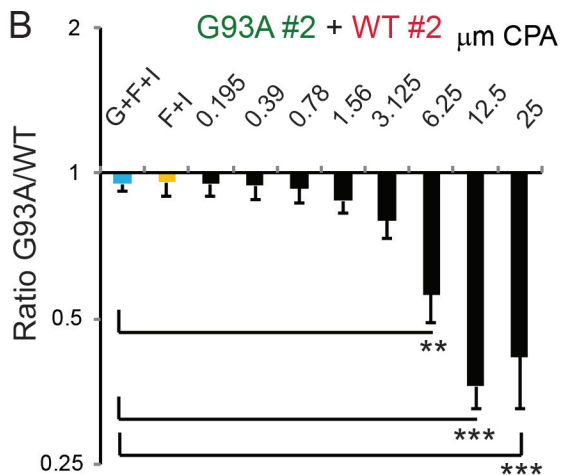

Mixed cultures

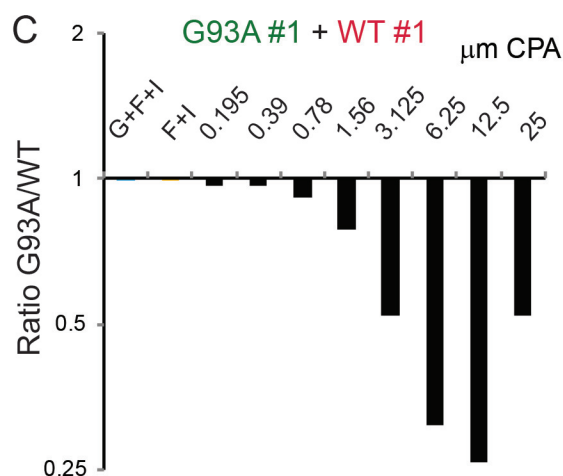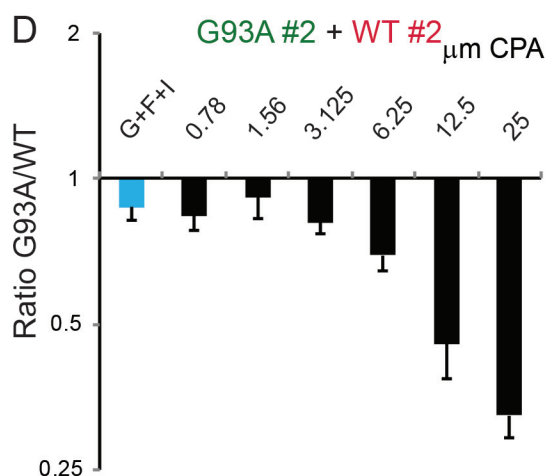

FACS-purified cultures

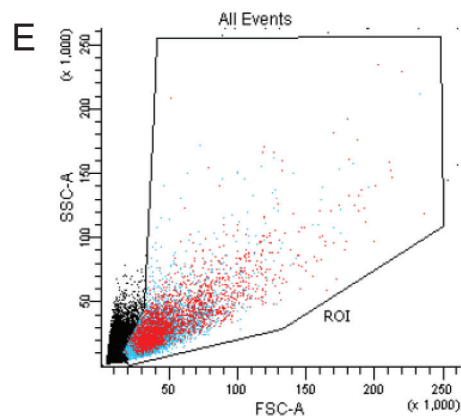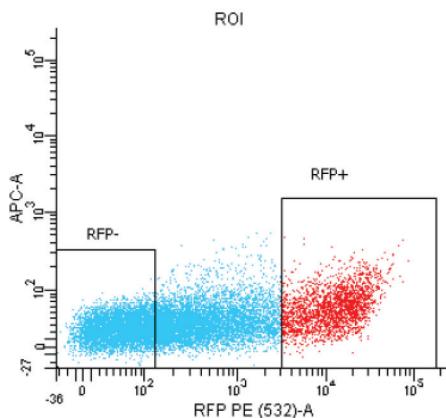

FACS: RFP

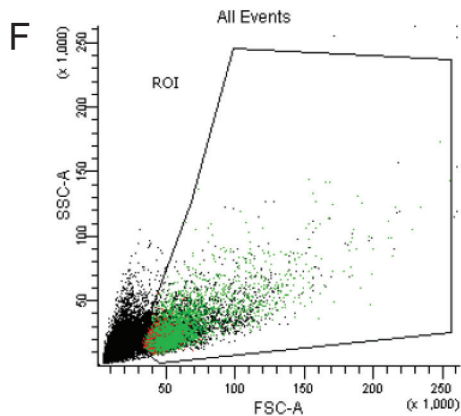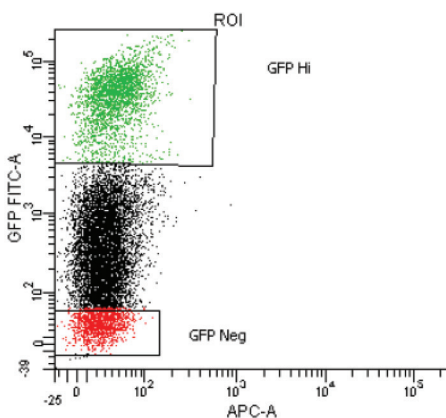

FACS: GFP

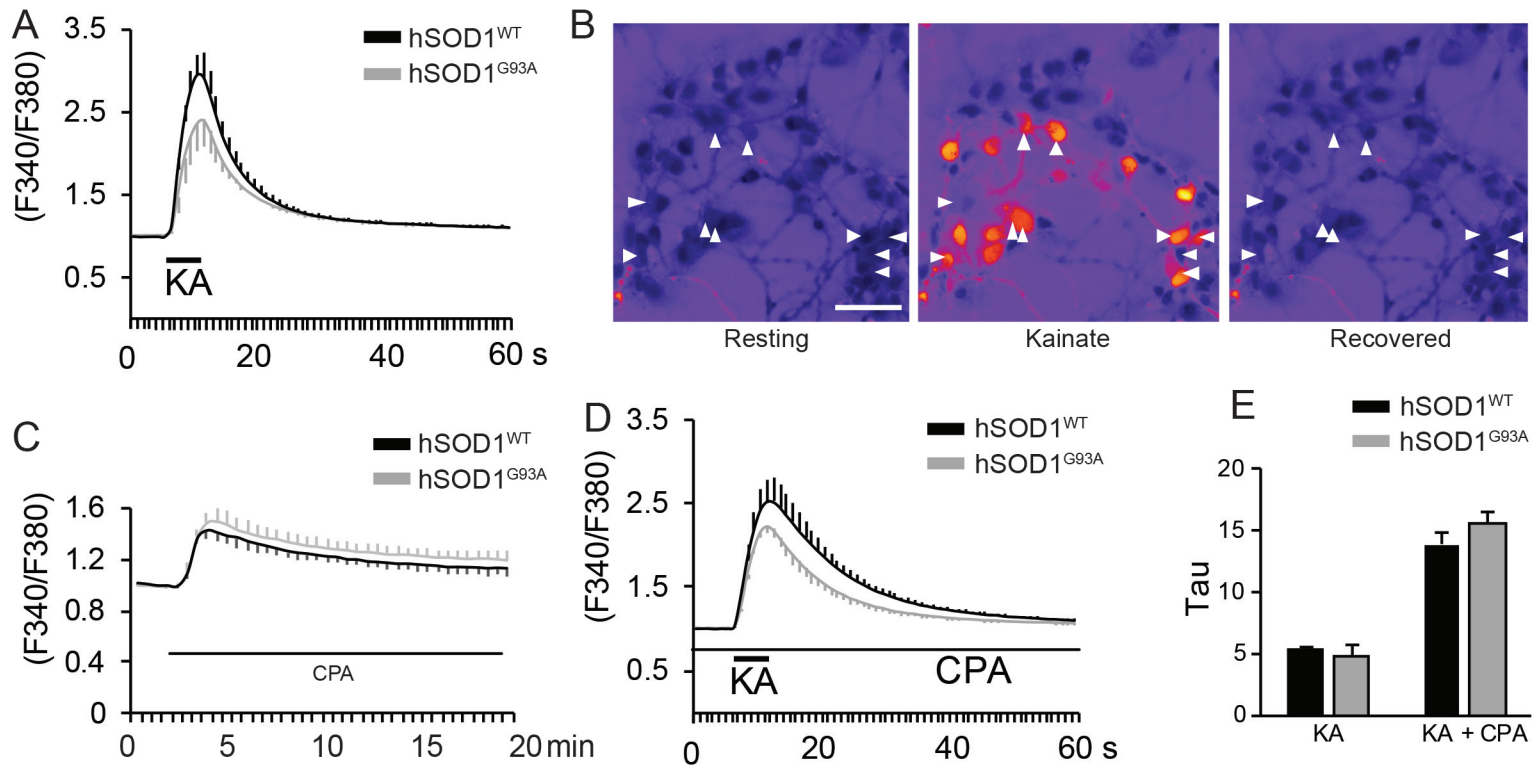

A

CPA rescue: motor neuron survival

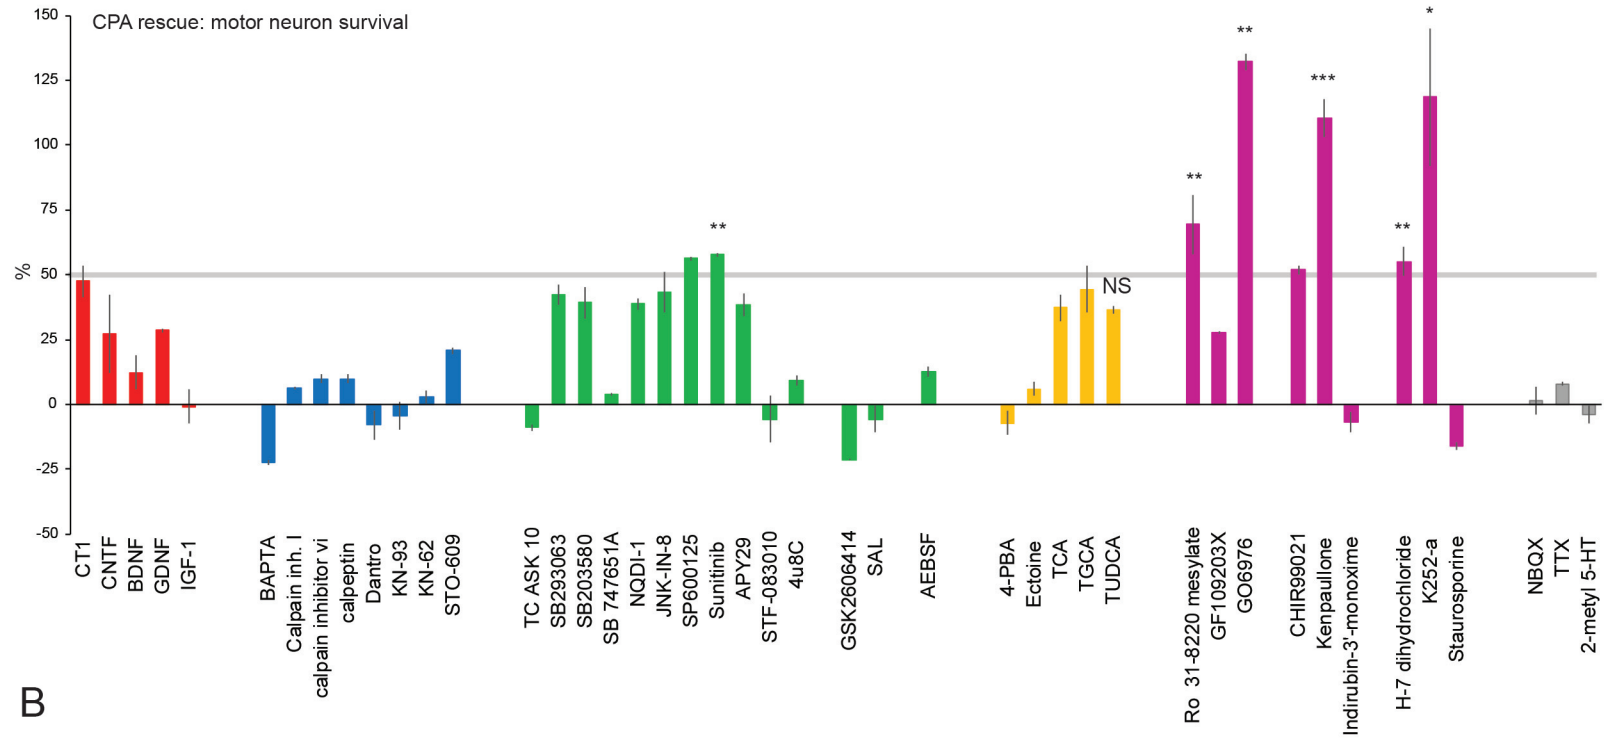

B

CPA rescue: neurite growth

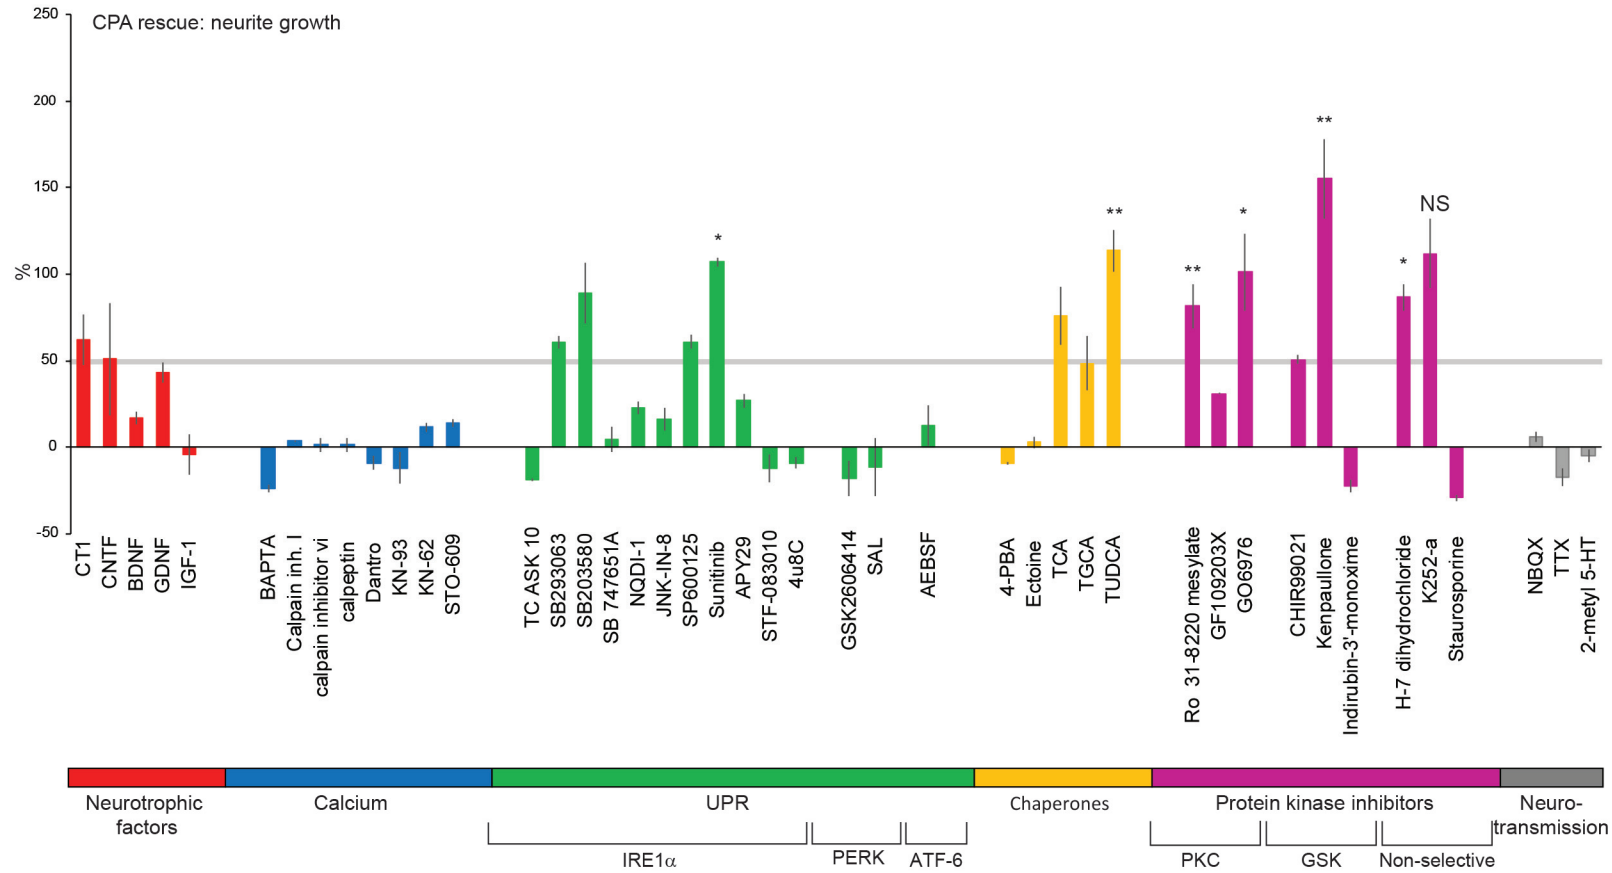

C

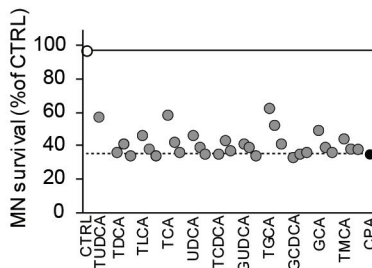

D

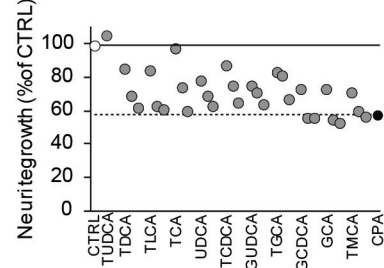



A

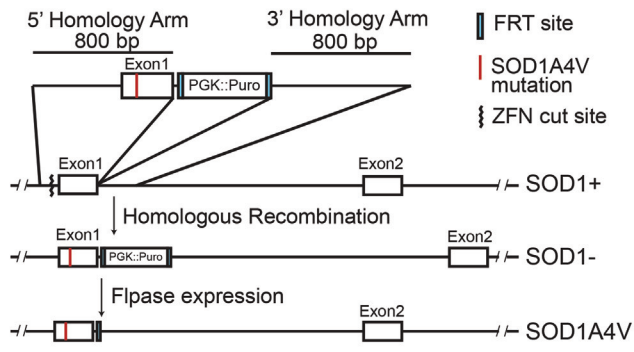

B

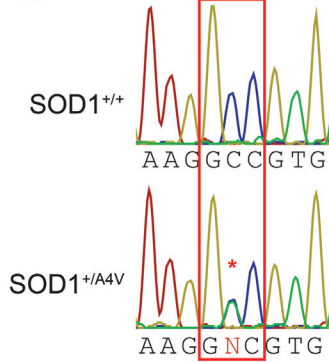

C

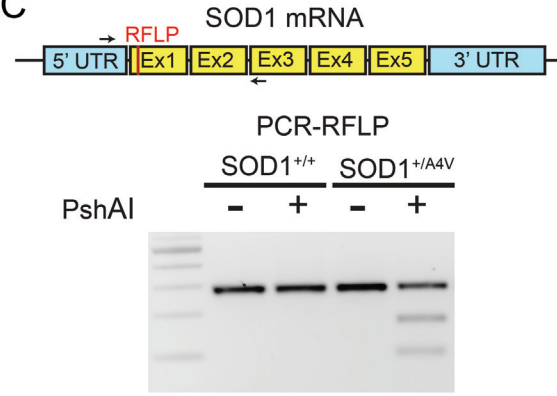

D

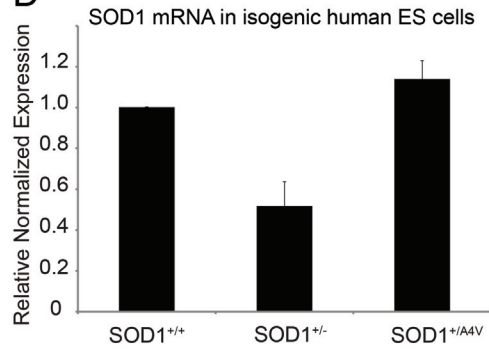

E

SOD1 protein in isogenic human ES cells

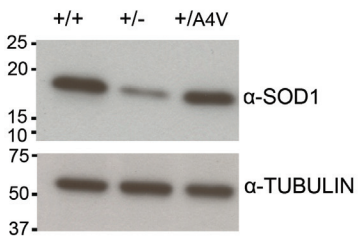

F

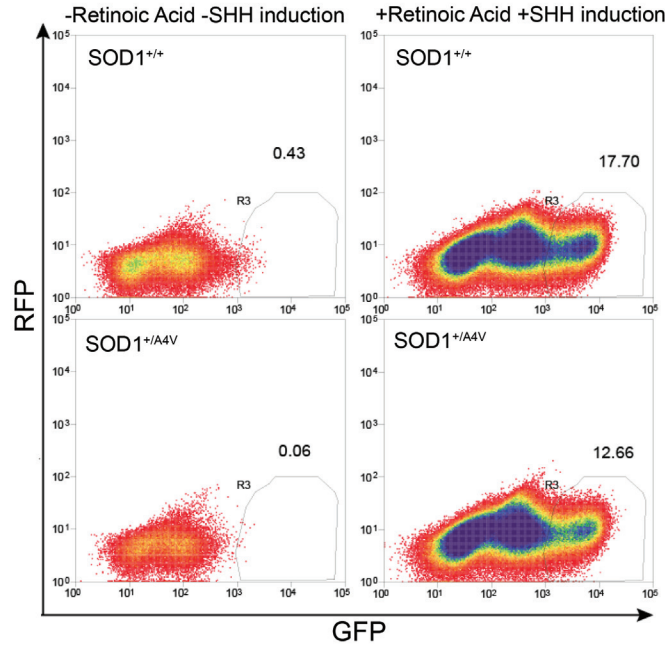

G

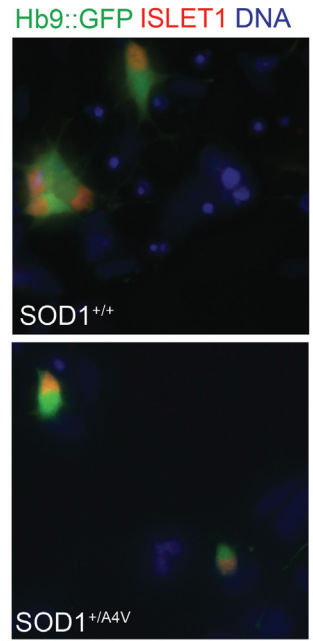

H

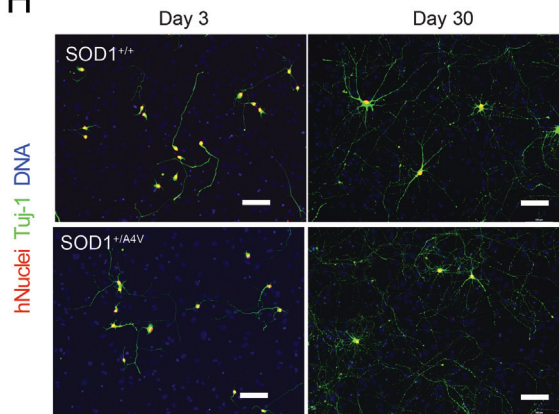

I

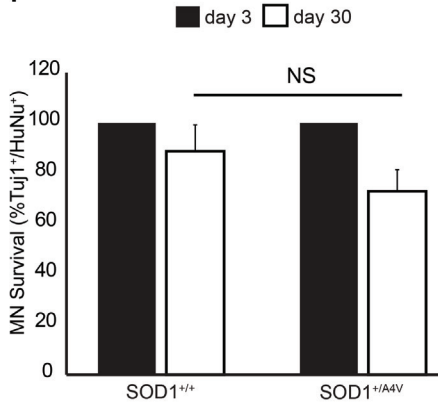

J

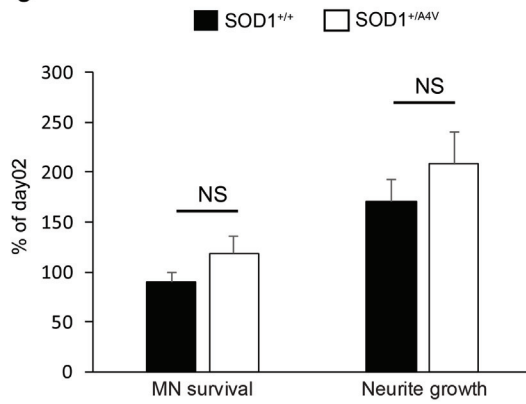

K

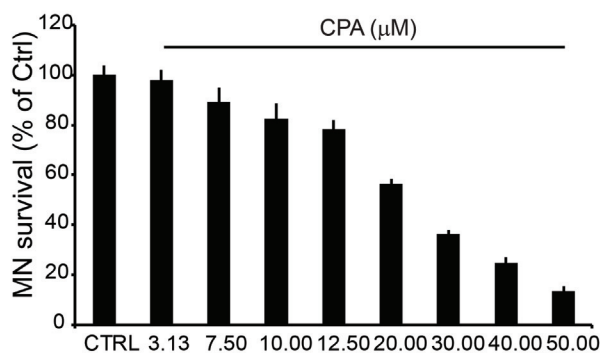

L

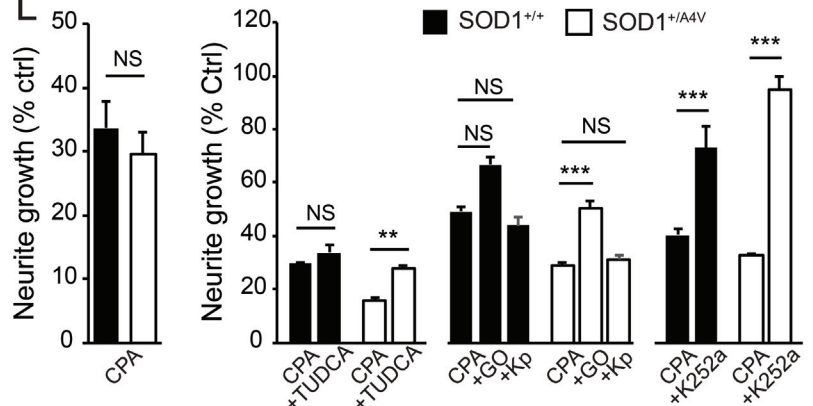

Fig. S6

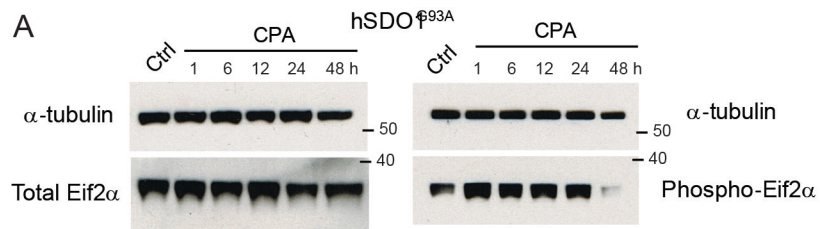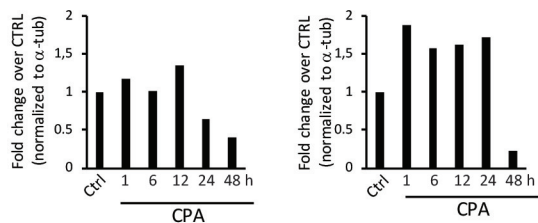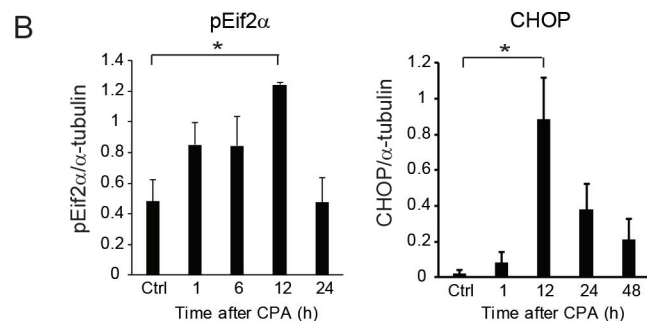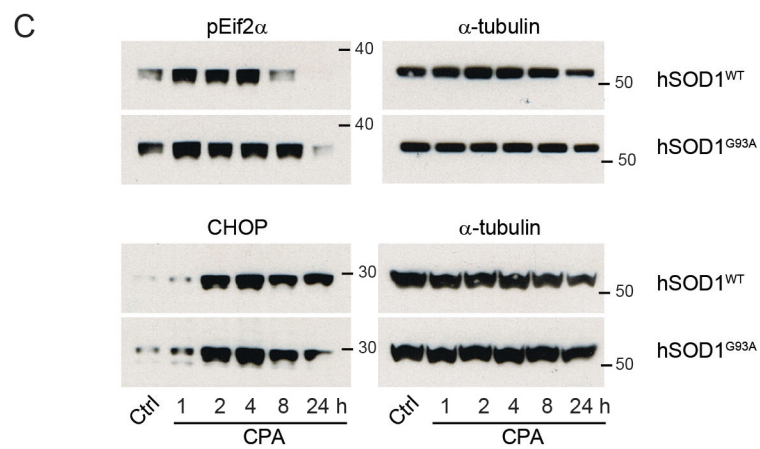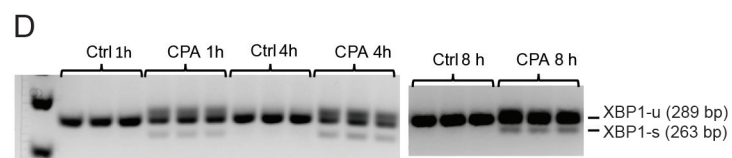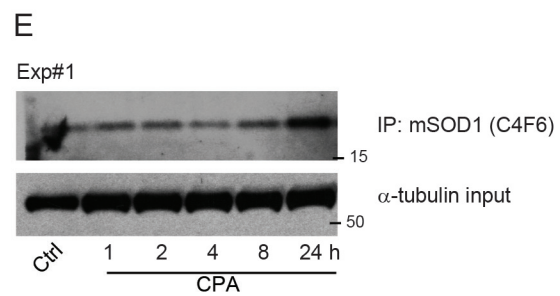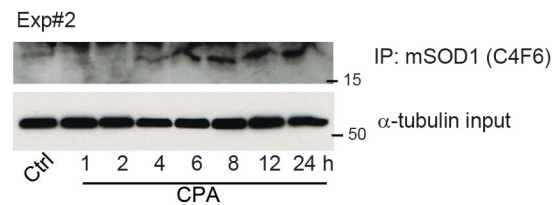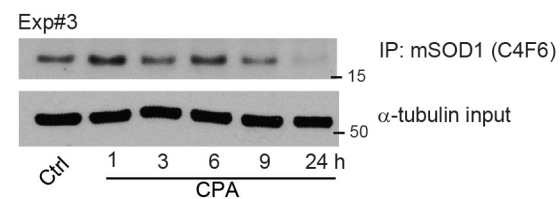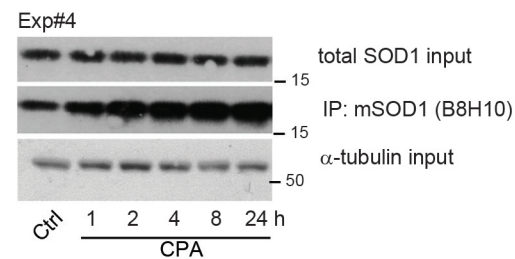

Fig. S7

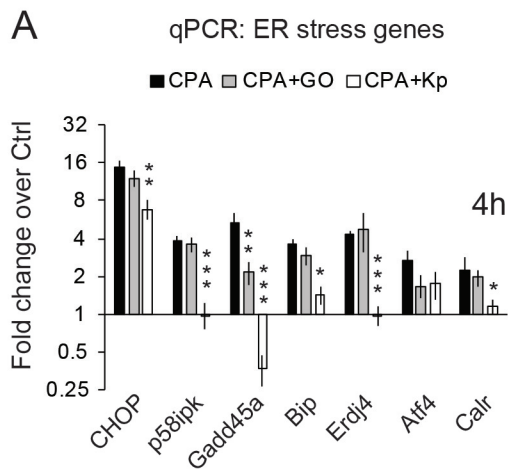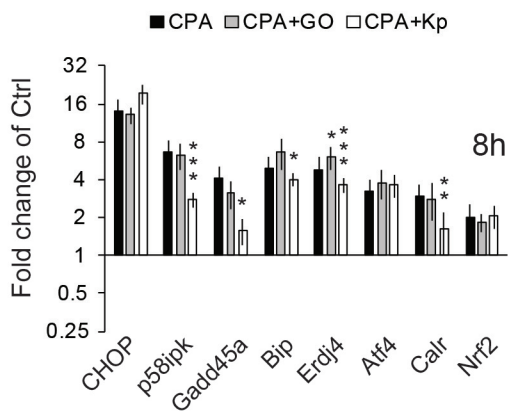

**B**

| Genes   | Pathway                                                                            |
|---------|------------------------------------------------------------------------------------|
| CHOP    | Induced by ER stress, mediates apoptosis.                                          |
| p58ipk  | Exerts negative feed back loop on PERK pathway                                     |
| GADD45a | Activates p38/JNK, regulated by-AP1 and ATF- 4.                                    |
| Bip     | UPR initiating factor.                                                             |
| Erdj4   | ER protein, induced by ER stress, regulates activity of 70kDa heat shock proteins. |
| Atf4    | UPR/PERK pathway.                                                                  |
| Calr    | Ca2-dependent ER chaperone.                                                        |
| Nrf2    | UPR/PERK pathway. Survival promoting transcription factor.                         |

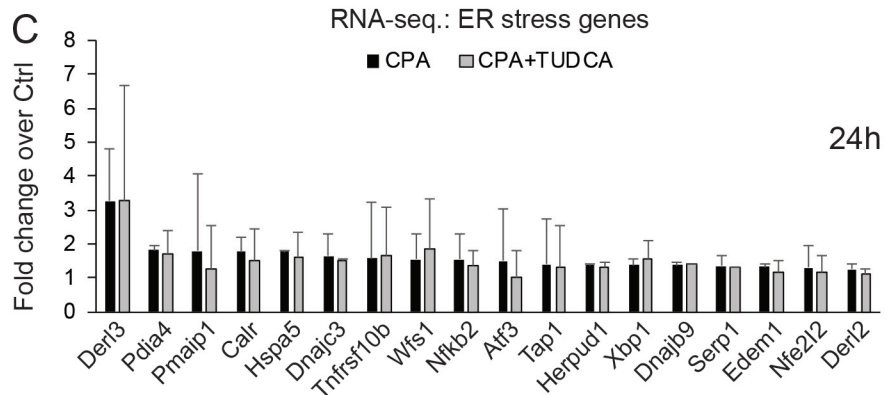

## Figure legends

**Figure S1. Evaluation of newly derived transgenic ES lines, biochemical analysis of normal- and misfolded SOD1 expression in differentiated cells, and survival motor neuron derived from cell-lines expressing different fluorescent reporters.** (A) Confocal micrographs showing sections of embryoid bodies from Hb9::RFP hSOD1<sup>WT</sup> and Hb9::GFP hSOD1<sup>G93A</sup> stained for motor neuron transcription factors Hb9 and Islet1/2. Scale bar 100  $\mu$ m. (B) Measurements of the overlap between fluorescent reporter protein (FP) and transcription factors (TF). Bars denote averages, error bars indicate SEM. (C-E) Light microscopy micrographs (C-D) and histogram (E) showing reporter validation in differentiated new ES lines (two lines for each reporter were differentiated in two separate rounds, results are presented as mean value/reporter). Scale 50  $\mu$ m. Bars denote means and error bars SEM. (F) Cropped images of immunoblots showing expression of total and misfolded (C4F6) SOD1 in untreated motor neuron cultures. P100 spinal cords from WT or SOD1<sup>G93A</sup> mice were used as controls. The dashed line indicates where the lower image was cropped. (G) Immunoblot showing the specificity for the C4F6 and B8H10 antibodies for misfolded mutant SOD1. (H) Motor neuron survival in transgenic hSOD1 WT and G93A cell lines expressing different fluorescent reporters. Survival was assessed in medium (G+F+I) and low (F+I) neurotrophic support in either mixed red-green cultures (red WT #1 + green G93A #1, n=6) or separate cultures (green WT #1, green G93A #2, n=3). Bars denote average, error bars indicate SEM, \*\*p<0.01 \*\*\*p<0.001 (Unpaired two-tailed Student's t-test). (I) Representative whole-well image of live cells, acquired with the Trophos Plate Runner<sup>HD</sup>. Scale bar 1 mm. (J) Magnification of (I) and the result of automated image analysis using Metamorph software. Scale bar 50  $\mu$ m. (K) 'Healthy cell criterion' using presence of a significant neurite to distinguish live cells from fluorescent debris.

**Figure S2. Evaluation of CPA toxicity in two independent pair of cell lines, in mixed and FACS-sorted motor neuron cultures.** (A-D) Dose response curves for motor neuron survival after CPA treatment in two independent pairs of WT-G93A cell lines (compiled results are shown in Fig. 1D and E). Cultures were either unpurified (A-B) or purified using FACS (C-D) (A: n=5, B: n=4, C: n=6 culture wells, D: n=2). Bars denote average, error bars indicate SEM, \*p<0.05, \*\*p<0.01, \*\*\*p<0.001 (One-way Anova, *post hoc* Dunnet's multiple comparison test). (E-F) Scatter plots showing representative gates for FACS-purification of reporter lines.

**Figure S3. Calcium homeostasis in Hb9::RFP hSOD1<sup>WT</sup> and hSOD1<sup>G93A</sup> motor neurons exposed to kainic acid and CPA. Biochemical analysis of normal- and misfolded SOD1 expression in differentiated cells.** (A) Kainic acid (KA)-induced change in cytoplasmic Ca<sup>++</sup> was assessed by calculating 340/380 nm ratio in Fura-2 labelled purified hSOD1<sup>WT</sup> and hSOD1<sup>G93A</sup> MN cultures. (B) Representative example still images of KA-induced calcium transients. Scale bar 50  $\mu$ m. Images are pseudocolored using the Lookup table 'fire' function in FIJI (increase in calcium is shown in warm colors). The slope of decrease in Fura-2 ratio (Tau) was measured in cultures exposed to kainic acid (KA) in absence or presence of CPA. (C) CPA-induced change in cytoplasmic Ca<sup>++</sup> was assessed by calculating 340/380 nm ratio in Fura-2 labelled purified hSOD1<sup>WT</sup> and hSOD1<sup>G93A</sup> MN cultures. (D) Kainic acid (KA)-induced change in cytoplasmic Ca<sup>++</sup> in the presence of CPA was assessed by calculating 340/380 nm ratio in Fura-2 labelled purified hSOD1<sup>WT</sup> and hSOD1<sup>G93A</sup> MN cultures (n=5 for WT, n=4 for G93A, for all analyzes). Bars denote average, error bars indicate SEM. (E) The slope of decrease in Fura-2 ratio (Tau) was measured in cultures exposed to kainic acid (KA) in absence or presence of CPA.

**Figure S4. Selected results from the ER stress rescue screen and mini screen for bile acid derivatives.** (A-B) Effects of rescue compounds on survival and neurite growth in CPA treated motor neuron cultures. Compounds are subcategorized and color-coded based on their putative mechanisms of action. Bars denote average, error bars indicate SEM (n=3-6 culture wells/compound). The cut-off level for further analysis is indicated by a grey line. Top compounds were compared to CPA only (n=3-6), \*p<0.05, \*\*p<0.01, \*\*\*p<0.001 (unpaired two-tailed Student's t-test or a Mann-Whitney Rank sum test). (C-D) Mini screen for survival (C) and neurite rescue (D) effects of bile acid derivatives. Each compound was screened in three different concentrations with 5X dilution steps. Bars denote average, error bars indicate SEM (n=3).

**Figure S5. Generation of human isogenic cell lines to study aspects of ALS pathogenesis *in vitro*.**

(A) Diagram of gene targeting strategy for introduction of the SOD1A4V mutant allele into the SOD1 locus of HUES3 Hb9::GFP. (B) Sequencing of the SOD1 locus. (C) PCR-RFLP analysis for a unique PshAI restriction site confirmed correct targeting. (D-E) qRT-PCR (D) and immunoblot (E) assays for SOD1 expression in targeted stem cell lines demonstrated reduced levels of the SOD1 transcript and protein levels. (F) FACS plots depicting a distinct population of differentiated cells which express the GFP reporter. Differentiated neural cells



not exposed to the MN patterning molecules RA and SAG were used as negative control to gate for green fluorescence. **(G)** Hb9::GFP<sup>+</sup> cells express the transcription factor Islet1 confirming spinal MN identity. **(H-I)** Cell survival assays in mixed cultures indicate a trend for reduced survival in isogenic human ESC MNs expressing the SOD1<sup>A4V</sup> variant relative to the isogenic control **(I)**. Representative images **(H)** of Human Nuclei and Tuj1 staining at days 3 and 30 ( $P = 0.09$ ,  $n = 4$ ). Scale bar 100  $\mu\text{m}$  **(J)** Short term assessment (5 days post dissociation) of MN survival and neurite growth in FACS-purified human isogenic lines, assessed by calcein labelling in live cultures. **(K)** Histogram showing a dose response survival curve for CPA toxicity in purified human SOD1<sup>+/A4V</sup> ESC MNs. Bars denote average, error bars indicate SEM ( $n=3$  culture wells/concentration). **(L)** Histogram showing neurite growth in purified isogenic human motor neuron cultures. Cells were grown under control conditions, treated with CPA or pretreated with rescue compounds followed by CPA ( $n=9$  for CPA vs. CTRL for both genotypes,  $n=3$  for rescue compounds for both genotypes). Bars denote average, error bars indicate SEM, \* $p<0.05$ , \*\* $p<0.01$ , \*\*\* $p<0.001$  (the effect of CPA was compared between WT vs. ALS MNs, as indicated with a line; the effects of rescue compounds were compared to CPA for each genotype).

### Figure S6. Biochemical analysis of UPR mediators and misfolded SOD1.

**(A)** Western blot showing protein levels of total (left) and phosphorylated Eif2 $\alpha$  (right) in cultures treated with CPA.  $\alpha$ -tubulin served as loading control. Eif2 $\alpha$  bands were quantified and normalized to the loading control, as displayed in the histograms. **(B)** Histograms showing quantification of replicate blots for pEif2 $\alpha$  ( $n=3-7$ ) and CHOP ( $n=2-6$ ), and their loading controls ( $\alpha$ -tubulin). Bars denote means  $\pm$  SEM, \* $p<0.05$  (One-way Anova, *post hoc* Dunnet's multiple comparison test for pEif2 $\alpha$  and a Kruskal-Wallis test with Dunn's multiple comparison *post hoc* test for CHOP). **(C)** Western blot showing induction of two UPR markers, pEif2 $\alpha$  and CHOP, in hSOD1<sup>WT</sup> and hSOD1<sup>G93A</sup> motor neuron cultures.  $\alpha$ -tubulin was used as loading control. Please note that hSOD1<sup>G93A</sup> blot for pEif2 $\alpha$  is the same as presented in panel (A). **(D)** Gel image used for quantification of spliced/unspliced XBP1. **(E)** Biological replicate blots for IP lysate and input two antibodies (C4F6 and B8H10) to analyze misfolded SOD1 levels,  $\alpha$ -tubulin was used as loading control. Experiment #4 shows that the levels of total SOD1 is unchanged after exposure to CPA.

### Figure S7. Analysis of ER stress-associated genes in cultures treated with CPA and rescue compounds.

**(A)** Histograms showing qPCR results for the ER stress panel for genes that were  $\geq 2$ -fold upregulated by CPA and  $\geq 2$ -fold downregulated in hSOD1<sup>G93A</sup> motor neuron cultures at 4 and/or 8 hours by at least one of the two tested compounds (GO=GÖ6967, Kp=kenpaullone). RNA was extracted from unpurified hSOD1<sup>G93A</sup> motor neurons ( $n=3$ , independent culture dishes). Bars denote average, error bars indicate SEM. CPA was compared to CPA+rescue compounds for each gene and time point, \* $p<0.05$ , \*\* $p<0.01$ , \*\*\* $p<0.001$  (One-way Anova, *post hoc* Dunnet's multiple comparison test; or Kruskal-Wallis test with Dunn's multiple comparison *post hoc* test). **(B)** Table showing pathways for the genes displayed in (A). **(C)** Selected results from an RNA-sequence analysis in purified hSOD1<sup>G93A</sup> motor neurons cultures at 24 hours after exposure to CPA. The histograms shows all ER stress-associated genes that were at least 1.5-fold upregulated by CPA. Bars denote means  $\pm$  standard deviation ( $n=2$ ).

Supplemental table 1

| CPA RESCUE SCREEN           | % rescue of CPA toxicity | % rescue of CPA toxicity |                                             |
|-----------------------------|--------------------------|--------------------------|---------------------------------------------|
| Compound                    | Cell death               | Neurite growth           | Category/pathway                            |
| DCA                         | 20.50911675              | 33.79013629              | Bile acids                                  |
| CA                          | 17.11925797              | 67.46744235              | Bile acids                                  |
| HDCA                        | 10.18137182              | 22.25725601              | Bile acids                                  |
| CDCA                        | 11.22034401              | 18.22205814              | Bile acids                                  |
| LCA                         | 9.085736241              | 22.6248862               | Bile acids                                  |
| nor-DCA                     | 14.57261804              | 19.56389175              | Bile acids                                  |
| HDCA-Me ester               | 7.110779149              | 18.92722876              | Bile acids                                  |
| 6-Et-CDCA                   | 9.986162197              | 38.17796374              | Bile acids                                  |
| dehydro-CA                  | 12.31894361              | 53.84822279              | Bile acids                                  |
| LCA-3-sulfate disodium salt | -2.074362332             | 6.127374543              | Bile acids                                  |
| ApoCA                       | 1.202390831              | -4.777710499             | Bile acids                                  |
| TDCA                        | 10.95840141              | 65.83163372              | Taruine conjugated bile acids and analogues |
| TLCA                        | 18.97294284              | 64.49009632              | Taruine conjugated bile acids and analogues |
| TCA                         | 38.08527479              | 93.68497917              | Taruine conjugated bile acids and analogues |
| UDCA                        | 18.2051565               | 47.99114566              | Taruine conjugated bile acids and analogues |
| TCDC                        | 14.28737331              | 40.5870975               | Taruine conjugated bile acids and analogues |
| GUDCA                       | 9.970678759              | 41.87969468              | Taruine conjugated bile acids and analogues |
| TGCA                        | 44.55414037              | 62.09291442              | Taruine conjugated bile acids and analogues |
| GCDCA                       | 2.568580788              | 4.418783172              | Taruine conjugated bile acids and analogues |
| GCA                         | 23.53008464              | 35.87867043              | Taruine conjugated bile acids and analogues |
| TMCA                        | 16.10051109              | 31.5368093               | Taruine conjugated bile acids and analogues |
| Ectoine                     | 5.031032977              | 4.253494542              | Chemical chaperons                          |
| Butylated hydroxyanisole    | 1.354844525              | -0.941491828             | Chemical chaperons                          |
| Ferrostatin-1               | 2.79356048               | -2.344252599             | Chemical chaperons                          |
| AL8810                      | 1.258232698              | -2.05527542              | Chemical chaperons                          |
| PBA                         | -41.56239575             | -11.70826719             | Chemical chaperons                          |
| AK1                         | -23.86319535             | -30.83271417             | PDI inhibitors                              |
| AK2                         | 1.337184819              | -3.257907284             | PDI inhibitors                              |
| AK3                         | -13.69763943             | -15.12140467             | PDI inhibitors                              |
| AK4                         | -39.65076275             | -46.47310177             | PDI inhibitors                              |
| AK5                         | -23.68718212             | 2.312235213              | PDI inhibitors                              |
| AK6                         | 3.063364798              | 2.312235213              | PDI inhibitors                              |
| AK7                         | -7.303783075             | -11.93026762             | PDI inhibitors                              |
| AK8                         | -27.88593481             | -36.62835997             | PDI inhibitors                              |
| AK9                         | -0.382896758             | -2.05527542              | PDI inhibitors                              |
| AK10                        | 0.714780145              | -10.31330492             | PDI inhibitors                              |
| AK11                        | 1.17828197               | -3.620404836             | PDI inhibitors                              |
| AK12                        | -11.97948204             | -17.65611204             | PDI inhibitors                              |
| AK13                        | 9.871088291              | 16.26285303              | PDI inhibitors                              |
| AK14                        | 0.788806148              | 1.478837654              | PDI inhibitors                              |
| AK15                        | 2.542958577              | 2.436655716              | PDI inhibitors                              |
| H89                         | -30.09836713             | -22.30613359             | PKA inhibitor                               |
| Ro 32-0432                  | 69.45362016              | 81.40427339              | PKC pathway                                 |
| Go 6976                     | 132.071419               | 164.4046336              | PKC pathway                                 |

|                                       |              |              |                             |
|---------------------------------------|--------------|--------------|-----------------------------|
| Phorbol-12-Myristate-13-Acetate (PMA) | 27.1651683   | 27.55476829  | PKC pathway                 |
| SRI22782                              | -10.20702158 | 18.68101413  | PKC pathway                 |
| H-7 dihydrochloride                   | 65.1027217   | 86.7200762   | PKC pathway                 |
| Staurosporine                         | 20.47359662  | 14.17999838  | PKC pathway                 |
| GF109203X                             | 27.85088299  | 30.94050956  | PKC pathway                 |
| Ro 31-8220 mesylate                   | 69.45362016  | 81.40427339  | PKC pathway                 |
| Calpain inh. I                        | 6.32809798   | 3.560770737  | Calcium signalling          |
| calpain inh. vi                       | 9.877545437  | 3.897137092  | Calcium signalling          |
| calpeptin                             | 3.098288729  | 0.67757198   | Calcium signalling          |
| Dorsomorphin dihydrochloride          | 6.73967196   | 27.84365219  | Calcium signalling          |
| KN-93                                 | -4.231510218 | -9.039734584 | Calcium signalling          |
| KN-62                                 | 3.130314662  | -4.057607419 | Calcium signalling          |
| SC 79                                 | -12.66320348 | 24.67689953  | Calcium signalling          |
| ML-7                                  | -16.018605   | -14.00783075 | Calcium signalling          |
| BAPTA-am                              | -22.4076638  | -23.85843413 | Calcium signalling          |
| Dantrol                               | -7.951848422 | -9.099424947 | Calcium signalling          |
| STO-609                               | 20.72023166  | 14.10316415  | Calcium signalling          |
| SB203580                              | 42.38514236  | 60.62167911  | P38 pathway                 |
| SB293063                              | 39.23672175  | 88.75752601  | P38 pathway                 |
| SB747651A                             | 19.57562965  | 7.742367164  | P38 pathway                 |
| TC ASK 10                             | -1.618735713 | -2.830851895 | UPR: IRE1a pathway          |
| NQDI-1                                | 38.83991819  | 14.22598976  | UPR: IRE1a pathway          |
| JNK-IN-8                              | 43.27201114  | 16.24361567  | UPR: IRE1a pathway          |
| SP600125                              | 56.27881783  | 60.92493308  | UPR: IRE1a pathway          |
| APY29                                 | 57.75930514  | 106.9694934  | UPR: IRE1a pathway          |
| 4u8C                                  | 9.303566151  | -0.004912081 | UPR: IRE1a pathway          |
| STF-083010                            | 9.975897399  | 3.15447713   | UPR: IRE1a pathway          |
| GSK2606414                            | 21.91490255  | 0.731015109  | UPR: PERK pathway           |
| SAL                                   | -5.720293345 | -11.87407306 | UPR: PERK pathway           |
| AEBSF                                 | 12.53726409  | 12.53726409  | UPR: ATF-6 pathway          |
| K-252a                                | 118.4447322  | 112.0067487  | MLK pathway                 |
| Indirubin-3'-monoxime                 | 1.508853123  | -0.051027126 | GSK3/CDK5 pathway           |
| Roscovitine                           | 5.759798441  | 50.80843357  | GSK3/CDK5 pathway           |
| Kenpaullone                           | 110.5319404  | 155.2520568  | GSK3/CDK5 pathway           |
| CHIR99021                             | 51.87279329  | 50.56491705  | GSK3/CDK5 pathway           |
| PD184352                              | -24.33699154 | -16.25729121 | MEK/ERK pathway             |
| BRD7386                               | -0.290118349 | -4.395083851 | MEK/ERK pathway             |
| TTX                                   | 19.50429801  | 0.62468452   | Neurotransmission           |
| 2-methyl 5-hydroxy tryptamine         | 0.767196361  | 3.779436554  | Neurotransmission           |
| Guanabenz acetate salt                | -5.953047358 | -1.698662404 | Neurotransmission           |
| NBQX                                  | 1.544616023  | 5.665939173  | Neurotransmission           |
| DOPA                                  | 2.064118232  | 38.55848623  | Neurotransmission           |
| PMA                                   | -5.730983276 | 25.50379088  | Neurotransmission           |
| Gambogic amide                        | 2.750107789  | 39.31132329  | Neurotransmission           |
| CT1                                   | 47.45118857  | 62.31697159  | Neurotrophic factors        |
| CNTF                                  | 27.2134856   | 50.77820319  | Neurotrophic factors        |
| BDNF                                  | 12.36232474  | 16.59337082  | Neurotrophic factors        |
| GDNF                                  | 28.46762539  | 43.13787768  | Neurotrophic factors        |
| IGF-1                                 | 4.009108083  | 0.416651788  | Neurotrophic factors        |
| TRIM                                  | 13.72176778  | 53.0837837   | NO signaling                |
| CD253 (TRAIL) Antibody                | -1.02268982  | 28.50003468  | TNF superfamily & apoptosis |
| Caspase-8 inhibitor II                | 2.170111685  | 45.44852287  | TNF superfamily & apoptosis |
| Sorafenib                             | -8.33727539  | -5.065283411 | Tyrosine kinase inhibitors  |
| Sunitinib                             | 57.75930514  | 106.9694934  | Tyrosine kinase inhibitors  |
| Ehop-016                              | -58.41396916 | -44.41603223 | Rac pathway                 |
| ZCL 278                               | 3.473221912  | 13.44168678  | Rac pathway                 |
| Fasudil                               | 8.602455737  | 18.08080674  | Rho pathway                 |

|                          |              |              |                   |
|--------------------------|--------------|--------------|-------------------|
| PF-4708671               | -11.45136888 | -16.50140601 | RSK inhibitor     |
| SL0101                   | 28.18089475  | 88.93617474  | RSK inhibitor     |
| PD407 5                  | 25.41529778  | NA           | Chk1 pathway      |
| NSC632839                | 3.12881176   | 10.71355041  | Isopeptidase inh. |
| Phenazine methosulfate   | -43.39544535 | -18.42018807 | Miscellaneous     |
| Phenethyl isothiocyanate | -29.4794646  | -5.868143127 | Miscellaneous     |

**Table S1. A screen for rescue of CPA toxicity**

A list of compounds tested for their ability to reverse CPA-induced MN toxicity and/or neurite retraction. Compounds are subdivided based on putative pathways or mechanisms of action. Rescue effects are expressed as % reversal of the CPA-effect for survival and neurite growth, for the best time point (24 or 48 hrs post CPA) and concentration tested. Values either represent the averages of replicate culture wells, or from independent experiments for compounds evaluated in follow-up experiments.
